# Supplementary material for: Impacts of climate and land-surface change on catchment evapotranspiration and runoff from 1951–2020 in Saxony, Germany
Source: Copernicus journal article supplement (doi:10.5194/hess-2024-6), 2024-01-10
Supplement: Supplementary file [file hess-2024-6-RC3-supplement.pdf]

To whom it may concern,

Thank you for allowing me the opportunity to review your paper. From my understanding, your paper is trying to tell the following story:

- Annual runoff data is changing due to climate change, and Saxony, Germany, has records that need to be upgraded.
- This paper updates the hydro-climatology for 71 catchments in Saxony and extends the previous study period to cover 1951-2020.
- The paper discusses water-energy partitioning over multiple decades.
- The method used is compared to others proposed by the literature.

Overall, the paper is clear and concise and merits publication. I propose a publication with minor technical corrections (see below).

Best,

Tadd Bindas

Minor Comment:

- Page 30 has a formatting issue where the figure is too large to fit on a page. This is a technical correction
